# Supplementary material for: SARS-CoV-2 infections in infants in Haiti 2020–2021; evidence from a seroepidemiological cohort
Source: PubMed Central journal article supplement (PMC9409576; doi:10.1371/journal.pone.0273482), 2022-08-25

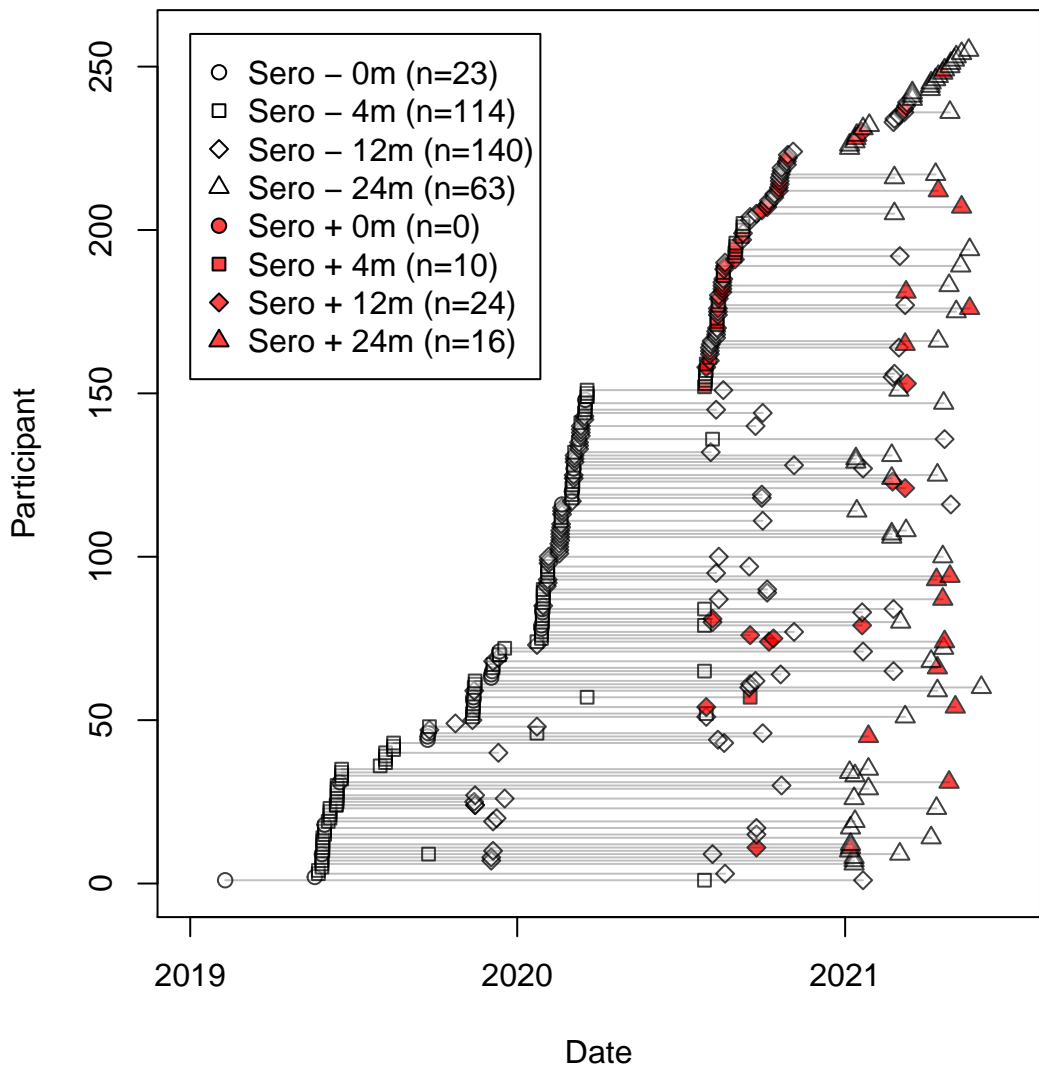

Supplement: pone.0273482.s002.pdf [file pone.0273482.s002.pdf]
